# Supplementary material for: Enhancing the feasibility of Pd/C-catalyzed formic acid decomposition for hydrogen generation – catalyst pretreatment, deactivation, and regeneration
Source: Royal Society of Chemistry journal article supplement (doi:10.1039/d1cy00300c), 2021-01-01
Supplement: d1cy00300c1.pdf [file d1cy00300c1.pdf]

# **Electronic Supporting Information – Enhancing the Feasibility of Pd/C-catalyzed Formic Acid Decomposition for Hydrogen Generation – Catalyst Pretreatment, Deactivation, and Regeneration**

Axel Kosider,<sup>†a</sup> Dominik Blaumeiser,<sup>†b</sup> Simon Schötz,<sup>b</sup> Patrick Preuster,<sup>c</sup> Andreas Bösmann,<sup>a</sup>  
Peter Wasserscheid,<sup>a,c</sup> Jörg Libuda<sup>b</sup> and Tanja Bauer<sup>\*b</sup>

*<sup>a</sup>Institute of Chemical Reaction Engineering, Friedrich-Alexander-Universität Erlangen-Nürnberg,  
Egerlandstraße 3, D-91058 Erlangen, Germany*

*<sup>b</sup>Interface Research and Catalysis, Erlangen Center for Interface Research and Catalysis, Friedrich-Alexander-  
Universität Erlangen-Nürnberg, Egerlandstraße 3, D-91058 Erlangen, Germany*

*<sup>c</sup>Forschungszentrum Jülich GmbH, Helmholtz Institute Erlangen-Nürnberg for Renewable Energy,  
Egerlandstraße 3, D-91058 Erlangen, Germany*

<sup>†</sup> shared first authorship

\*corresponding author: Tanja Bauer, [tanja.tb.bauer@fau.de](mailto:tanja.tb.bauer@fau.de)

**Keywords:** *formic acid decomposition (FAD), catalyst poisoning, catalyst regeneration, diffuse reflectance infrared Fourier transform spectroscopy (DRIFTS)*

## NMR measurements

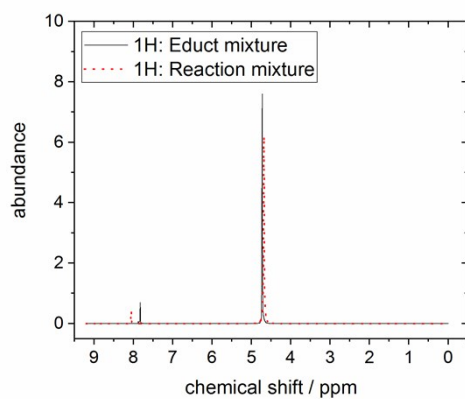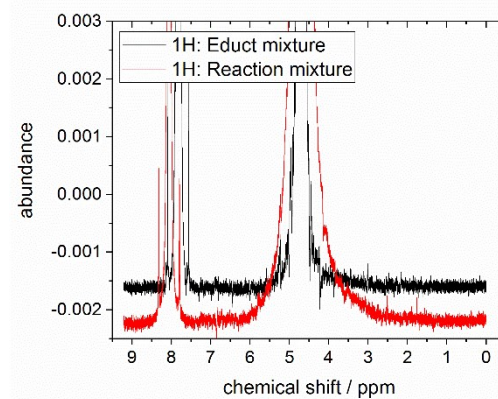

Fig. S1:  $^1\text{H}$ -NMR.

The chemical shift at 8 ppm belongs to the protons of water. The chemical shifts around 4.6 ppm belong to the proton of the C-H-group FA or formate that is shifted because of different concentrations.

## Catalyst loading

Table S1: Comparison of the catalyst metal loadings of fresh and deactivated Pd/C before and after FAD.

| Material                              | Metal loading / wt% |
|---------------------------------------|---------------------|
| Fresh Pd/C                            | 4.9                 |
| Pd/C after FAD                        | 4.5                 |
| Pd/C after regeneration and recycling | 4.6                 |

## Investigation of the BET-surface of the catalysts

Table S2: Comparison of the catalyst BET-surface of fresh and deactivated Pd/C before and after FAD.

| Material          | BET-surface / m <sup>2</sup> g <sup>-1</sup> |
|-------------------|----------------------------------------------|
| Fresh Pd/C        | 662                                          |
| Pd/C after<br>FAD | 630                                          |

## **Experimental section on TEM**

The TEM measurements were performed with a Philips CM30 transmission electron microscope at the Center for Nanoanalysis and Electron Microscopy (CENEM). We used a voltage of 150 - 300 kV and the particle size distribution was evaluated with the ImageJ software package.<sup>1</sup> To account for deviations, we evaluated 501 particles of the fresh Pd/C catalyst and 1851 particles of the used Pd/C catalyst.

## Characterization of the catalysts by TEM before FAD

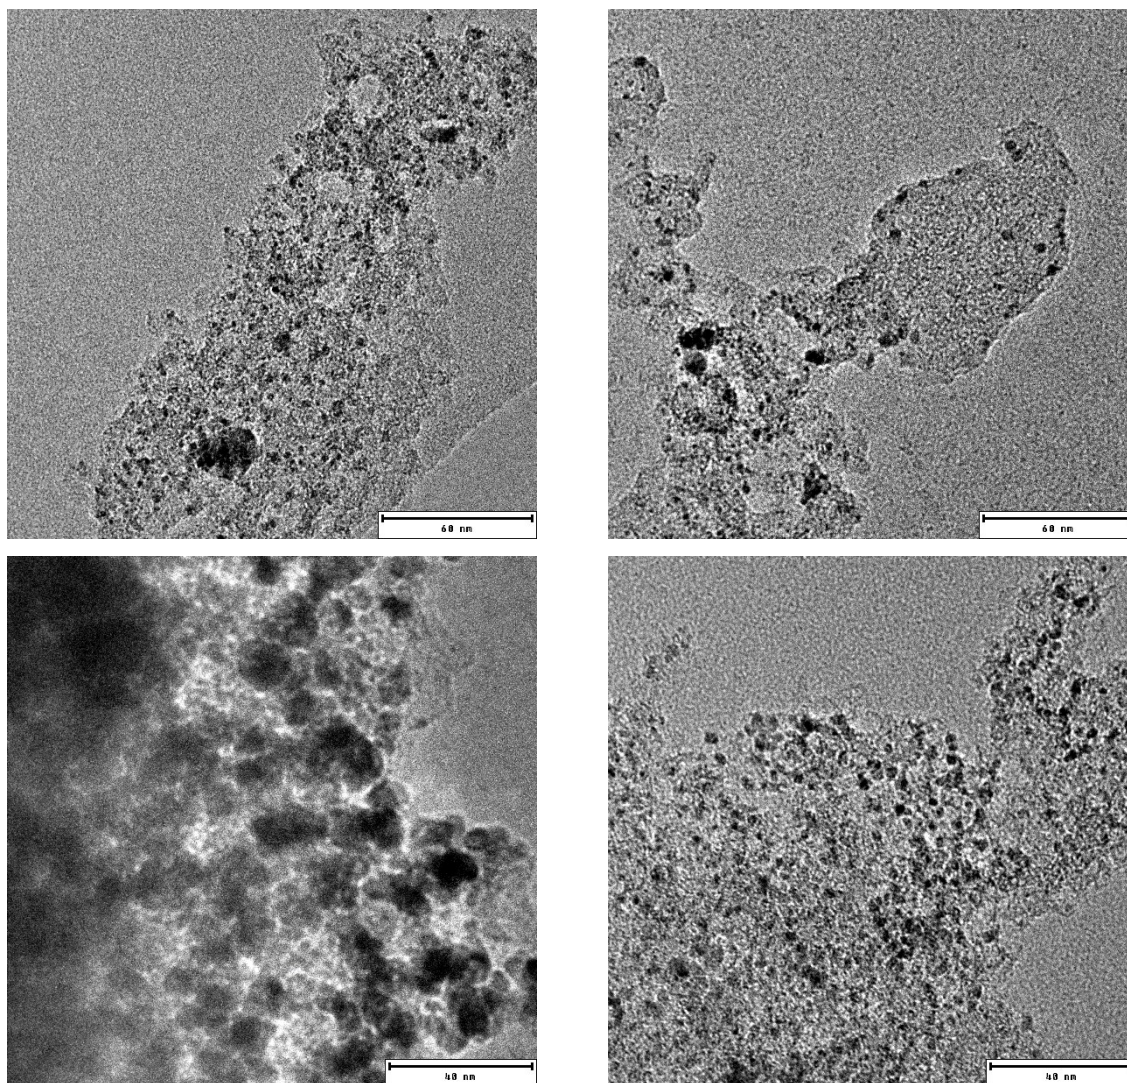

Fig. S2: TEM of fresh Pd/C before FAD.

## Characterization of the catalysts by TEM after FAD

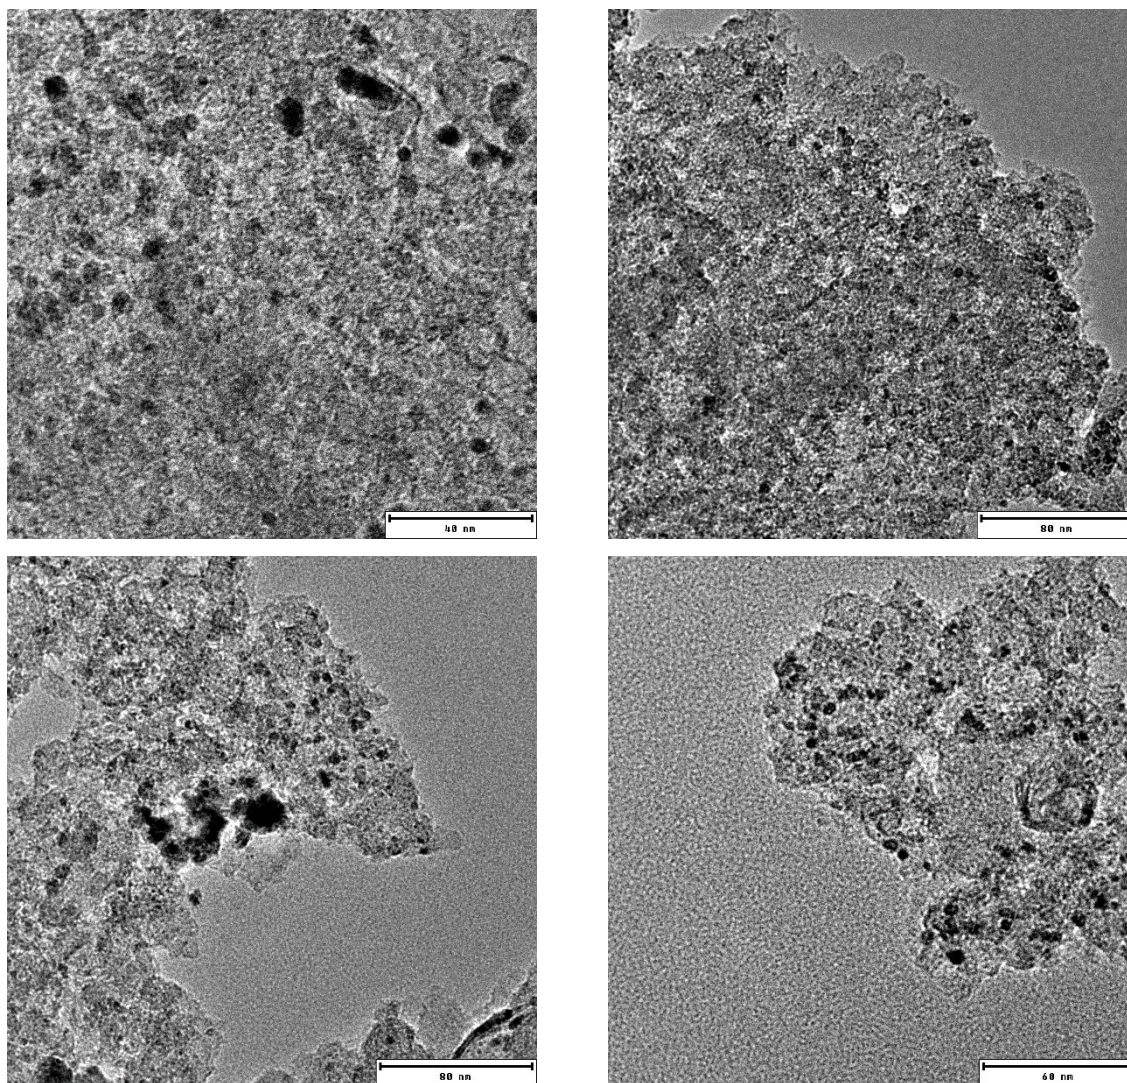

Fig. S3: TEM of deactivated Pd/C after FAD.

## Size distribution of the Pd nanoparticles

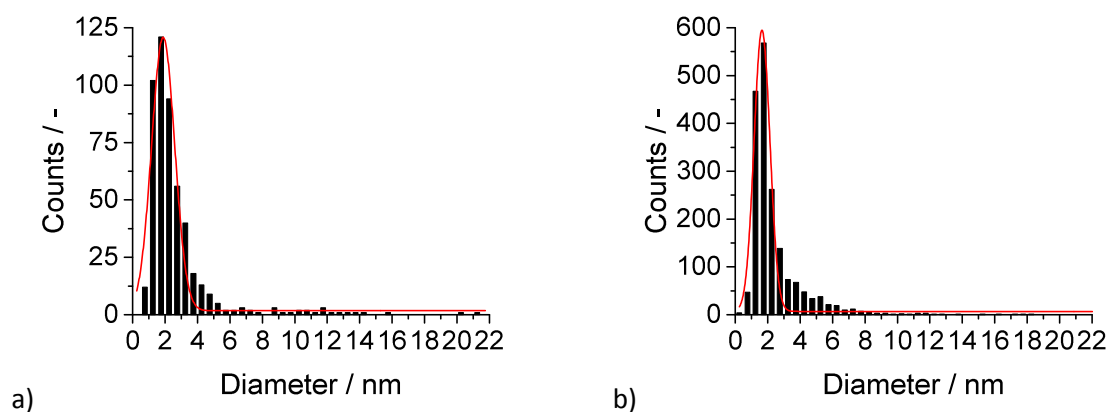

Fig. S4: Palladium particle size distribution from TEM measurements of a) fresh Pd/C before FAD and b) deactivated Pd/C after FAD.

In Figure S4, the particle size distribution as obtained by TEM is shown for a fresh (Figure S4a) and used Pd/C catalyst (Figure S4b). For the fresh Pd/C sample, the average size distribution was  $1.9 \pm 0.7$  nm. The deactivated catalyst showed an average size distribution of  $1.7 \pm 0.5$  nm. As the size of the Pd clusters remains constant, agglomeration is excluded to cause the deactivation of the Pd/C catalyst during FAD.

## DRIFTS measurements on pristine $\text{Al}_2\text{O}_3$

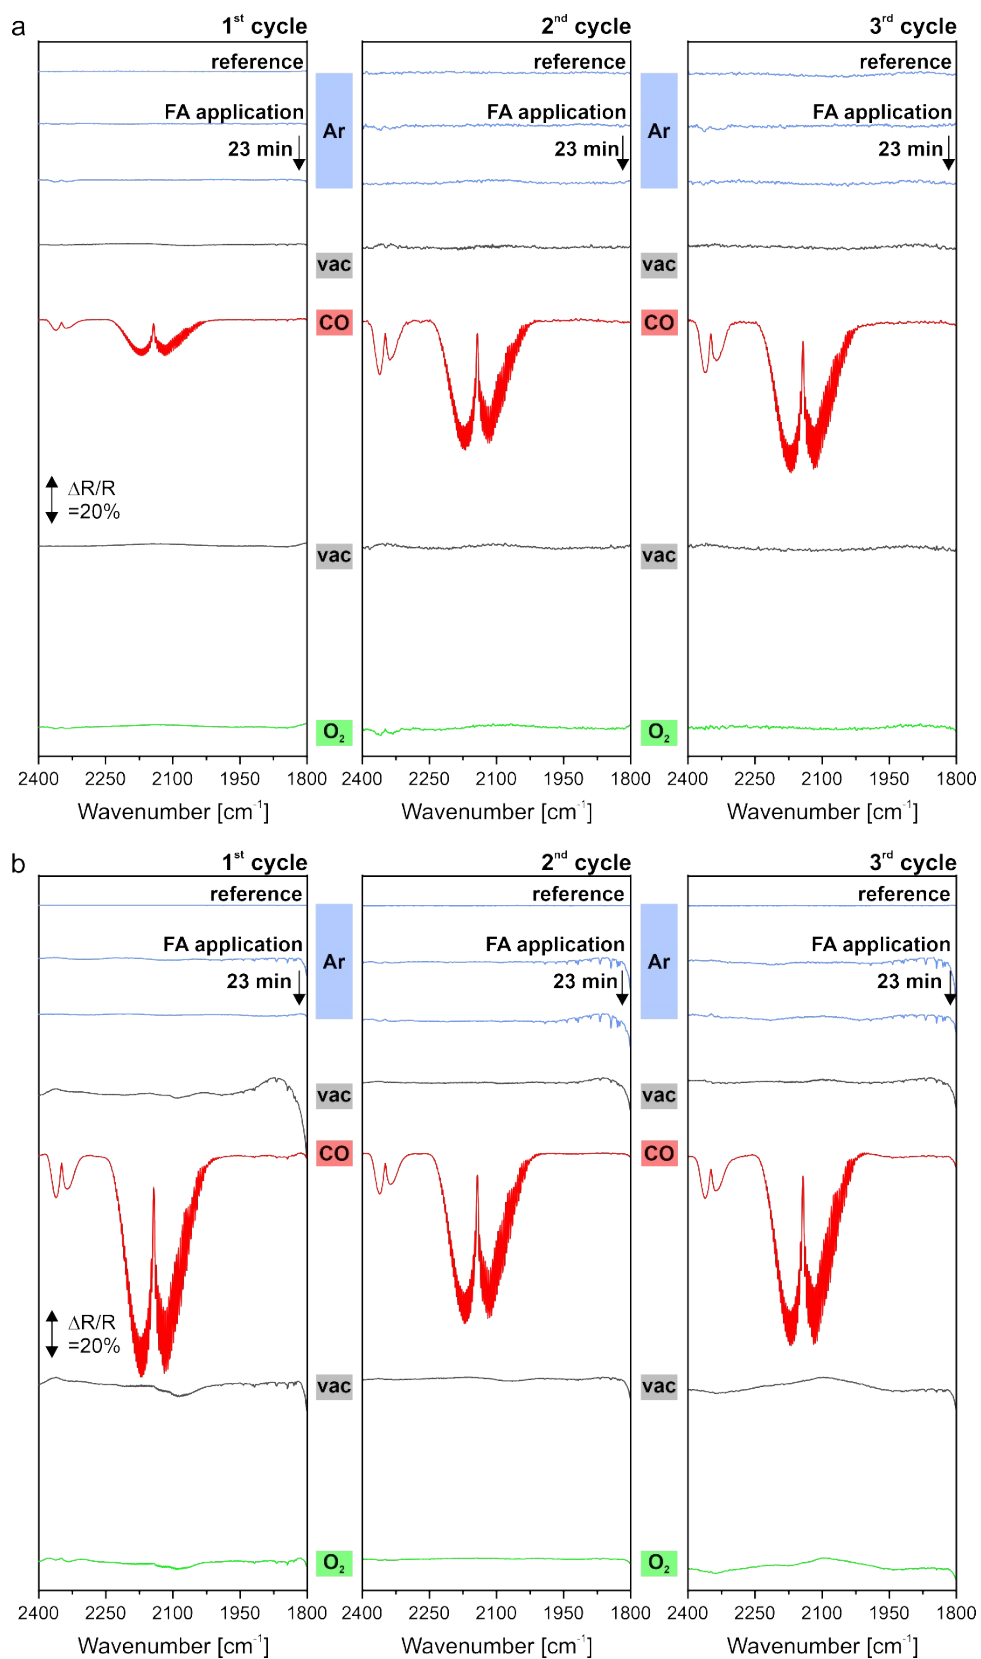

Fig. S5 Offset DRIFT spectra recorded during three cycles of Ar, FA, CO, and O<sub>2</sub> dosing with intermediate evacuation on a) O<sub>2</sub>-pretreated Al<sub>2</sub>O<sub>3</sub> and b) H<sub>2</sub>-pretreated Al<sub>2</sub>O<sub>3</sub>; m<sub>cat</sub>°°°0.1°g; 20vol%°HCOOH; T°°30°°C; p(Ar)°°°p(CO)°°°p(O<sub>2</sub>)°°°1°bar; p(vac)°°°~1°mbar.

## Fingerprint region during FAD

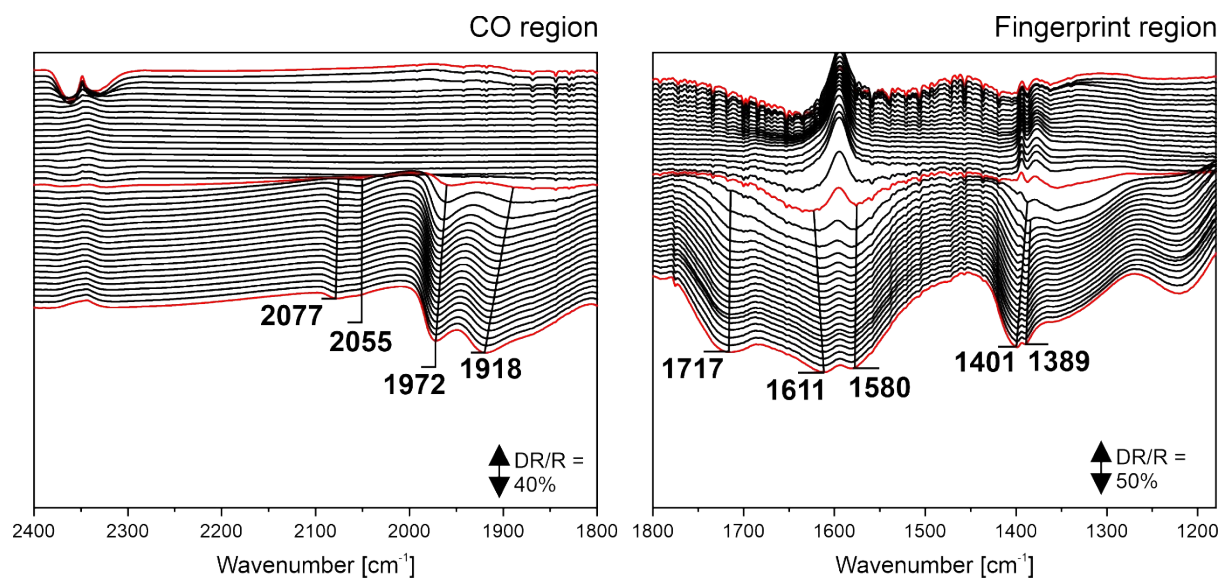

Fig. S6: Time resolved spectra during the evacuation interval in the CO and the fingerprint region.

## All cycles including intermediate H<sub>2</sub> treatment

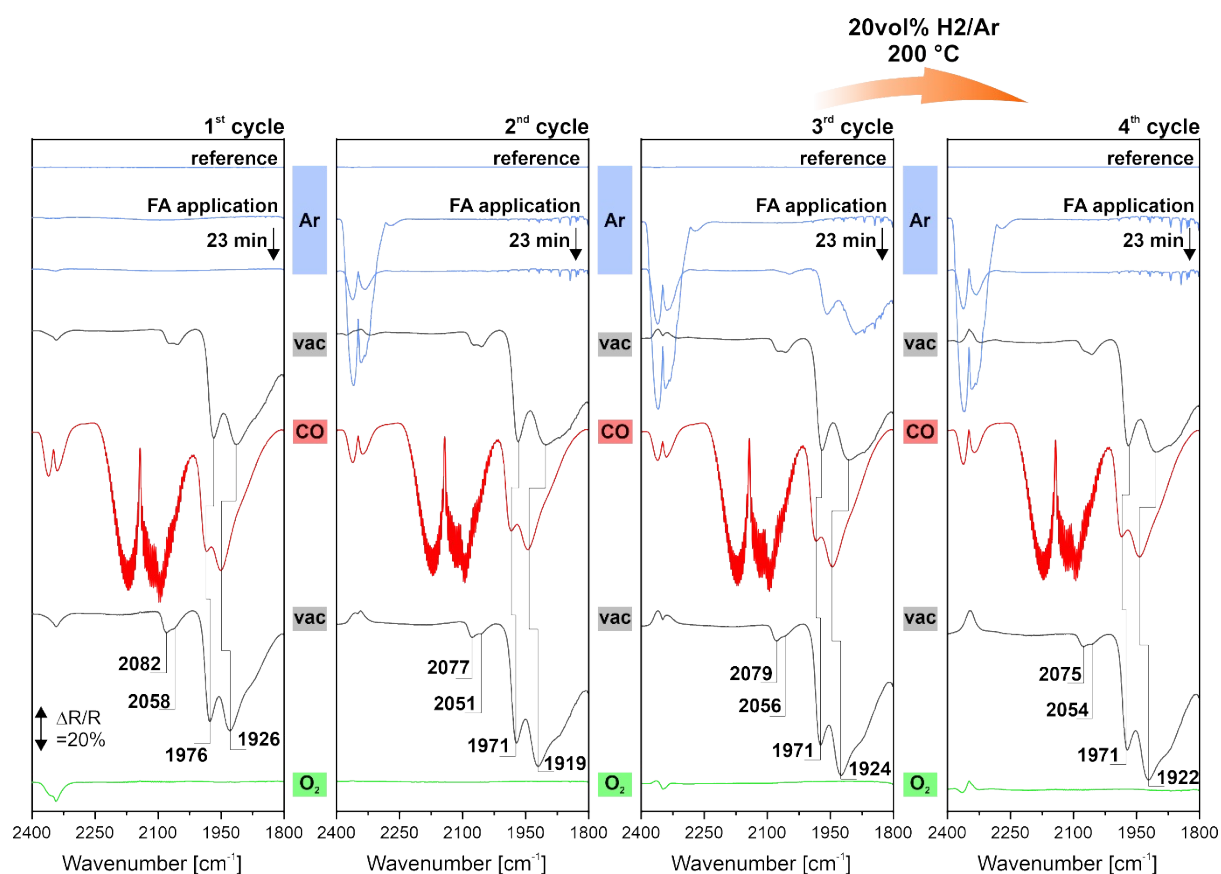

Fig. S7: All dosing cycles of (O<sub>2</sub>+H<sub>2</sub>)-Pd/Al<sub>2</sub>O<sub>3</sub> sample;  $m_{\text{cat}} \approx 0.1 \text{ g}$ ; 20vol% HCOOH;  $T = 30^\circ \text{C}$ ;  $p(\text{Ar}) = p(\text{CO}) = p(\text{O}_2) = 1 \text{ bar}$ ;  $p(\text{vac}) \approx 1 \text{ mbar}$ .

## References

1. C. T. Rueden, J. Schindelin, M. C. Hiner, B. E. DeZonia, A. E. Walter, E. T. Arena and K. W. Eliceiri, *BMC Bioinf.*, 2017, **18**, 1-26.
